# Supplementary material for: Modulated self-assembly of metal–organic frameworks
Source: PubMed Central journal article supplement (PMC8159241; doi:10.1039/d0sc01356k), 2020-04-06
Supplement: SC-011-D0SC01356K-s001.pdf [file SC-011-D0SC01356K-s001.pdf]

## Modulated Self-Assembly of Metal-Organic Frameworks

Ross S. Forgan\*

WestCHEM School of Chemistry, University of Glasgow, Glasgow, UK.

Email: ross.forgan@glasgow.ac.uk

### SUPPORTING INFORMATION

**Table S1.** Names, abbreviations, and chemical structures of MOF and COF ligands discussed in this Perspective. **Page S2.**

**Table S2.** Names, chemical structures, and  $pK_a$  values for the modulators discussed in this perspective. **Page S4.**

**Table S1.** Names, abbreviations, and chemical structures of MOF and COF ligands discussed in this Perspective.

| Abbreviation               | Name                                              | Structure                                                                             |
|----------------------------|---------------------------------------------------|---------------------------------------------------------------------------------------|
| 1,4-bdc                    | 1,4-Benzenedicarboxylate                          | 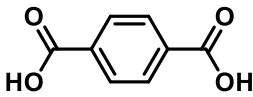    |
| 1,4-ndc                    | 1,4-Naphthalene dicarboxylate                     |     |
| dabco                      | 1,4-Diazabicyclo [2.2.2]octane                    |    |
| 1,3,5-btc                  | 1,3,5-Benzenetricarboxylate                       |     |
| 2-NH <sub>2</sub> -1,4-bdc | 2-Amino-1,4-benzenedicarboxylate                  |    |
| bpdc                       | Biphenyl-4,4'-dicarboxylate                       |   |
| tpdc-NH <sub>2</sub>       | 2'-Amino-1,1':4,1''-terphenyl-4,4''-dicarboxylate |   |
| bIm                        | Benzimidazole                                     |  |
| MeIm                       | 2-Methylimidazole                                 |  |
| abdc                       | Azobenzene-4,4'-dicarboxylate                     |   |
| edb                        | 4,4'-Ethynylenedibenzoate                         |   |
| 4,4'-bipy                  | 4,4'-Bipyridine                                   |  |

|         |                                                                       |  |
|---------|-----------------------------------------------------------------------|--|
| tptc    | 1,1':4',1''-Terphenyl-3,3'',5,5''-tetracarboxylate                    |  |
| dttdc   | Dithieno[3,2- <i>b</i> ;2',3'- <i>d</i> ]-thiophene-2,6-dicarboxylate |  |
| 2,6-ndc | 2,6-Naphthalene dicarboxylate                                         |  |
| tpdc    | 1,1':4,1''-Terphenyl-4,4''-dicarboxylate                              |  |
| sdc     | Stilbene-4,4'-dicarboxylate                                           |  |
| –       | Benzene-1,4-diboronic acid                                            |  |
| –       | 2,3,6,7,10,11-hexahydroxytriphenylene                                 |  |

**Table S2.** Names, chemical structures, and  $pK_a$  values for the modulators discussed in this perspective.

| Modulator                              | Structure                                                                            | $pK_a$ (if relevant) |
|----------------------------------------|--------------------------------------------------------------------------------------|----------------------|
| <i>p</i> -Perfluoromethyl benzoic acid | 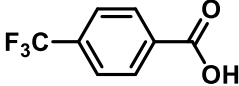    | 3.69                 |
| Acetic acid                            |     | 4.76                 |
| Pyridine                               |     | –                    |
| Dodecanoic acid                        |    | 5.30                 |
| Benzoic acid                           |     | 4.20                 |
| Perfluorobenzoic acid                  |    | 1.60                 |
| Stearic acid                           |  | 10.15                |
| Sodium formate                         |   | –                    |
| Sodium acetate                         |   | –                    |
| Trimethylamine                         |   | –                    |
| Diethylamine                           |   | –                    |
| 1-Methylimidazole                      |   | –                    |
| <i>n</i> -Butylamine                   |   | –                    |
| 4-Decylbenzoic acid                    |  | 4.35                 |
| Formic acid                            |   | 3.77                 |
| HCl                                    | HCl                                                                                  | -6.3                 |
| L-proline                              |   | 1.99                 |

|                                         |                                                                                      |            |
|-----------------------------------------|--------------------------------------------------------------------------------------|------------|
| Difluoroacetic acid                     | 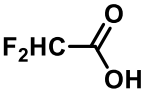    | 1.24       |
| Trifluoroacetic acid                    |     | 0.23       |
| 4-Dodecylbenzoic acid                   |    | 4.48       |
| Chloroacetic acid                       |     | 2.87       |
| Dichloroacetic acid                     |     | 1.35       |
| Alendronate                             |     | –          |
| $\alpha$ -Cyano-4-hydroxy cinnamic acid |    | 4.90       |
| 4-Trifluoromethyl cyclohexanoic acid    |   | –          |
| PEG-COOH                                |  | –          |
| Biotin-COOH                             |  | –          |
| 4-Azidomethyl benzoic acid              |   | –          |
| 4-Propargyloxy benzoic acid             |   | –          |
| Oxalic acid                             |   | 1.46, 4.40 |
